# Supplementary material
Source: MDPI journal article supplement (https://www.mdpi.com/2076-3298/9/7/91)
Supplement: s1 [file s1]

## Article

# CH<sub>4</sub> and CO<sub>2</sub> Emissions from the Decomposition of Microplastics in the Bottom Sediment—Preliminary Studies

Małgorzata Kida \*, Sabina Ziembowicz \* and Piotr Koszelnik

Department of Environmental and Chemistry Engineering, Faculty of Civil and Environmental Engineering and Architecture, Rzeszow University of Technology AVE Powstańców Warszawy 6, 35-959 Rzeszów, Poland

\* Correspondence: mkida@prz.edu.pl (M.K.); s.ksiazek@prz.edu.pl (S.Z.)

**Table S1.** Average concentrations of methane and carbon dioxide.

| GHG                       | lp   | CH <sub>4</sub> [ppm] |          |         | CO <sub>2</sub> [ppm] |           |           |
|---------------------------|------|-----------------------|----------|---------|-----------------------|-----------|-----------|
| Time [d]                  |      | 30                    | 180      | 360     | 30                    | 180       | 360       |
| blank sample              | 1    | 148.78                | 19.998   | 44.56   | 5195.95               | 4211.87   | 25366.45  |
|                           | 2    | 155.25                | 20.75    | 44.89   | 5190.24               | 4341.36   | 26986.15  |
|                           | 3    | 146.109               | 21.592   | 41.062  | 5176.94               | 4301.44   | 27070     |
|                           | mean | 150.046               | 20.78    | 43.504  | 5186.709              | 4284.89   | 26474.213 |
|                           | SD   | 3.84                  | 0.65     | 1.73    | 7.96                  | 54.14     | 784.05    |
|                           | CV   | 2.56                  | 3.13     | 3.98    | 0.15                  | 1.26      | 2.96      |
| PVC low of plasti-cizers  | 1    | 225.09                | 3825.44  | 83.15   | 6094.12               | 13005.6   | 60169.2   |
|                           | 2    | 207.89                | 3800.56  | 79.89   | 6187.5                | 12255.4   | 59780.7   |
|                           | 3    | 212.695               | 3808.8   | 75.583  | 6808.79               | 12223.4   | 56232.3   |
|                           | mean | 215.225               | 3811.599 | 79.541  | 6363.468              | 12494.819 | 58727.401 |
|                           | SD   | 7.25                  | 10.35    | 3.10    | 317.19                | 361.43    | 1771.42   |
|                           | CV   | 3.37                  | 0.27     | 3.90    | 4.98                  | 2.89      | 3.02      |
| PP                        | 1    | 200.95                | 1380.11  | 76.9    | 7744.98               | 19587.6   | 64147.6   |
|                           | 2    | 211.7                 | 1455.3   | 79.45   | 7599.5                | 21008.6   | 62988.5   |
|                           | 3    | 200.244               | 1414.72  | 86.104  | 7241.35               | 20483.5   | 69850.8   |
|                           | mean | 204.298               | 1416.71  | 80.818  | 7528.61               | 20359.9   | 65662.3   |
|                           | SD   | 5.24                  | 30.73    | 3.88    | 211.63                | 586.67    | 2999.28   |
|                           | CV   | 2.57                  | 2.17     | 4.80    | 2.81                  | 2.88      | 4.57      |
| PVC high of plasti-cizers | 1    | 1213.25               | 24950.63 | 198.52  | 14295.36              | 15010.36  | 59588.9   |
|                           | 2    | 1254.6                | 25136.8  | 205.13  | 15011.27              | 15877.55  | 62101     |
|                           | 3    | 1231.87               | 25671    | 207.366 | 15373.83              | 15000.39  | 63549.3   |
|                           | mean | 1233.24               | 25252.81 | 203.672 | 14893.48667           | 15296.1   | 61746.4   |
|                           | SD   | 16.91                 | 305.32   | 3.76    | 448.09                | 411.17    | 1636.15   |
|                           | CV   | 1.37                  | 1.21     | 1.84    | 3.01                  | 2.69      | 2.65      |
| Rubber 3000-8000          | 1    | 341.25                | 51.1     | 71.154  | 6125.4                | 14005.97  | 41520.9   |
|                           | 2    | 337.21                | 57.6     | 71.45   | 6478.6                | 15014.6   | 39548.21  |
|                           | 3    | 313.772               | 56.32    | 67.969  | 6338.87               | 14144.48  | 39806.89  |
|                           | mean | 330.744               | 55.01    | 70.191  | 6314.29               | 14388.35  | 40292     |
|                           | SD   | 12.11                 | 2.81     | 1.58    | 145.24                | 446.42    | 875.36    |
|                           | CV   | 3.66                  | 5.11     | 2.25    | 2.30                  | 3.10      | 2.17      |
| Rubber 1000-3000          | 1    | 456.48                | 160.47   | 125.9   | 7644.12               | 18698.3   | 46890.6   |
|                           | 2    | 449.65                | 172.69   | 116.84  | 7719.55               | 20154.59  | 48950.41  |
|                           | 3    | 411.773               | 171.719  | 119.969 | 8582.336              | 19427.3   | 45324.02  |
|                           | mean | 439.301               | 168.293  | 120.903 | 7982.002              | 19426.73  | 47055.01  |
|                           | SD   | 19.66                 | 5.55     | 3.76    | 425.62                | 594.53    | 1485.03   |
|                           | CV   | 4.48                  | 3.30     | 3.11    | 5.33                  | 3.06      | 3.16      |

|             |      |         |          |          |             |          |          |
|-------------|------|---------|----------|----------|-------------|----------|----------|
| Rubber 1000 | 1    | 358.47  | 18966.78 | 5296.45  | 10256.4     | 19567.41 | 48259.6  |
|             | 2    | 349.12  | 17963.2  | 5197.32  | 11012.45    | 20456.45 | 50146.87 |
|             | 3    | 326.012 | 19302.53 | 4982.645 | 10747.27    | 20036.74 | 51107.23 |
|             | mean | 344.534 | 18744.17 | 5158.805 | 10672.04    | 20020.2  | 49837.9  |
|             | SD   | 13.64   | 568.99   | 130.97   | 313.21      | 363.14   | 1182.89  |
|             | CV   | 3.96    | 3.04     | 2.54     | 2.93        | 1.81     | 2.37     |
| Rubber 600  | 1    | 594.65  | 22199.45 | 5910.23  | 21148.66    | 23878.69 | 56104.58 |
|             | 2    | 617.89  | 22104.68 | 6114.31  | 20962.11    | 22744.15 | 57002.16 |
|             | 3    | 608.988 | 23743.22 | 6078.825 | 19282.51    | 22574.98 | 53998.63 |
|             | mean | 607.176 | 22682.45 | 6034.455 | 20464.42667 | 23065.94 | 55701.79 |
|             | SD   | 9.57    | 751.07   | 89.03    | 839.20      | 578.84   | 1258.83  |
|             | CV   | 1.58    | 3.31     | 1.48     | 4.10        | 2.51     | 2.26     |

SD - standard deviation, CV - coefficient of variation

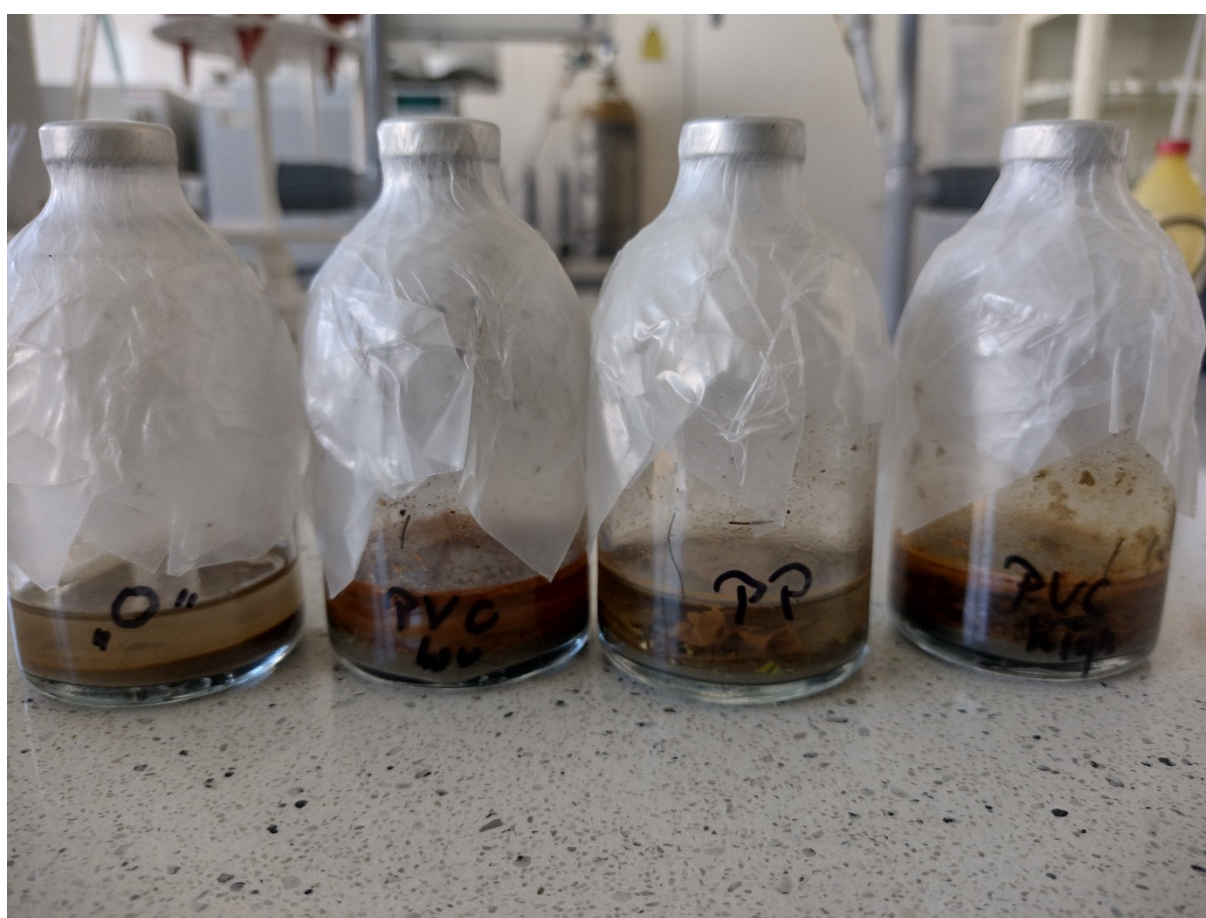

Figure S1. a. Prepared experimental samples.

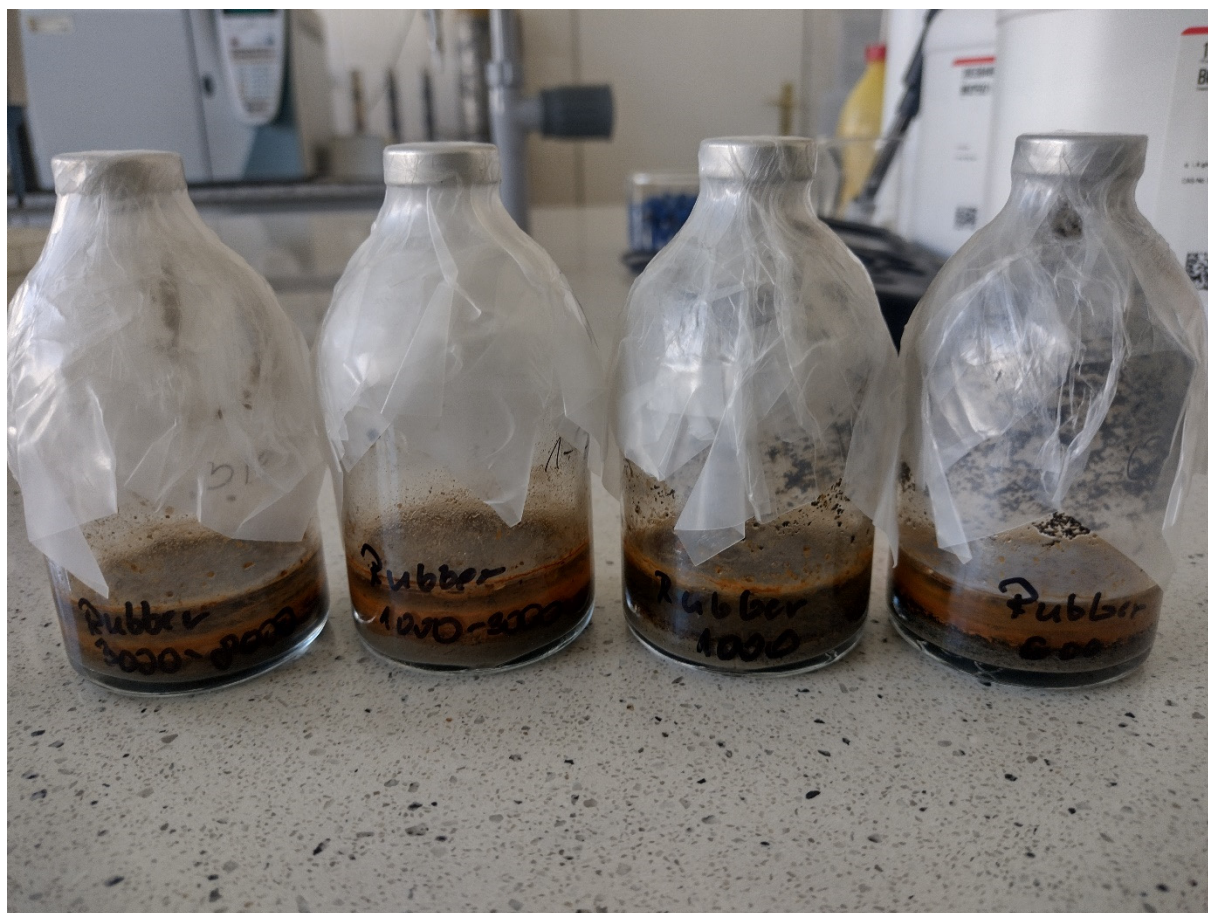

Figure S1. b. Prepared experimental samples.
